# Supplementary material for: An optimised patient-derived explant platform for breast cancer reflects clinical responses to chemotherapy and antibody-directed therapy
Source: PubMed Central journal article supplement (PMC11150370; doi:10.1038/s41598-024-63170-0), 2024-06-04
Supplement: 41598_2024_63170_MOESM4_ESM.pdf [file 41598_2024_63170_MOESM4_ESM.pdf]

## **An optimised patient-derived explant platform for breast cancer reflects clinical responses to chemotherapy and antibody-directed therapy**

Constantinos Demetriou<sup>1</sup>, Naila Abid<sup>1</sup>, Michael Butterworth<sup>1</sup>, Larissa Lezina<sup>1</sup>, Pavandeep Sandhu<sup>1</sup>, Lynne Howells<sup>1</sup>, Ian R Powley<sup>1</sup>, James Howard Pringle<sup>1</sup>, Zahirah Sidat<sup>2</sup>, Omar Qassid<sup>1,3</sup>, Dave Purnell<sup>3</sup>, Monika Kaushik<sup>4</sup>, Kaitlin Duckworth<sup>4</sup>, Helen Hartshorn<sup>4</sup>, Anne Thomas<sup>1</sup>, Jacqui A Shaw<sup>1</sup>, Marion MacFarlane<sup>5,6\*</sup>, Catrin Pritchard<sup>1\*</sup>, Gareth J Miles<sup>1\*</sup>

### **Additional File 4. Optimisation of multiplexed Immuno-Fluorescence**

Whole slide mIF-stained FFPE sections of BC-PDEs were digitised using a Vectra Polaris and analysed in InForm. **A**, Captured AF, Ki67, CK and cPARP staining was used to generate pseudo-H&E and -DAB images. InForm was then trained to segment tissue into tumour (yellow), stroma (green), necrosis (red) and background/glass (blue). Next, cells were segmented and phenotyped into Ki67 (green), cPARP (Red) and DAPI (blue). **B**, Representative examples of vehicle- and FET-treated BC-PDEs showing high Ki67 staining in vehicle samples and low Ki67 staining in FET-treated samples as well as high cPARP staining in FET-treated samples, with low staining in vehicle samples. Scale bars = 50  $\mu\text{m}$ . **C**, Representative examples of necrosis shown in mIF, with CK+ve cPARP+ve DAPI-ve, and as a H&E. Scale bars = 20  $\mu\text{m}$ .

# Additional File 4

## A

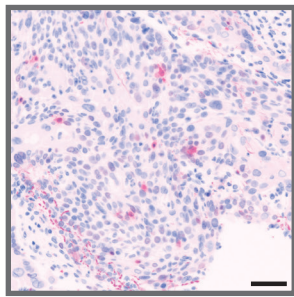

Pseudo-H&E

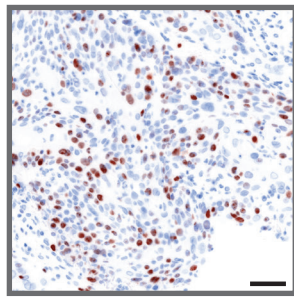

Pseudo-Ki67

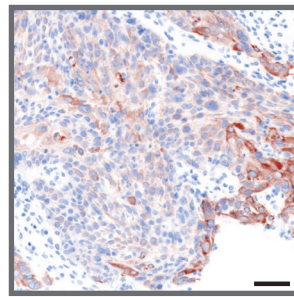

Pseudo-Cytokeratin

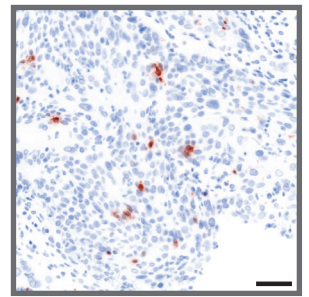

Pseudo-cPARP

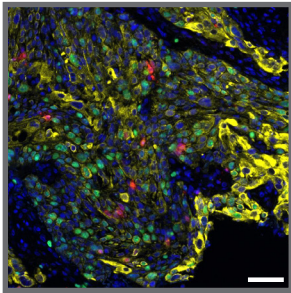

Merge

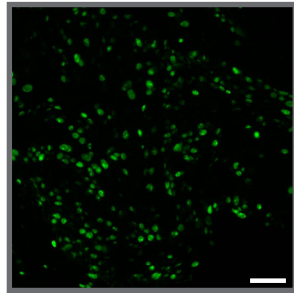

Ki67

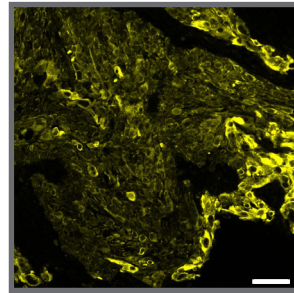

Cytokeratin

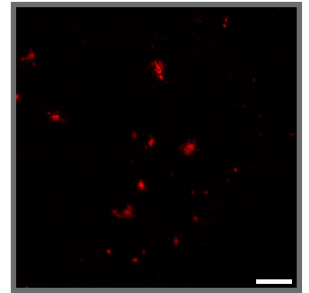

cPARP

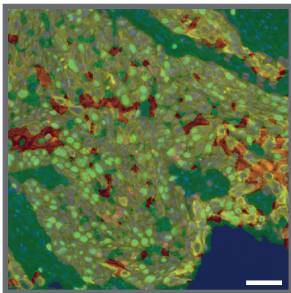

Tissue Segmentation

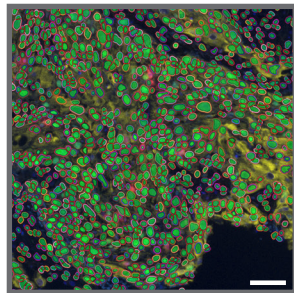

Cell Segmentation

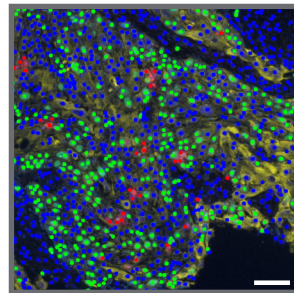

Phenotyping

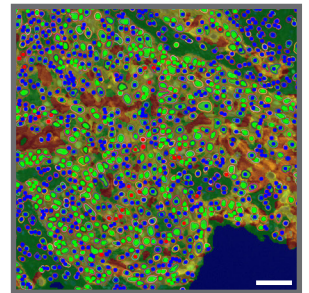

All Processing

## B

Control

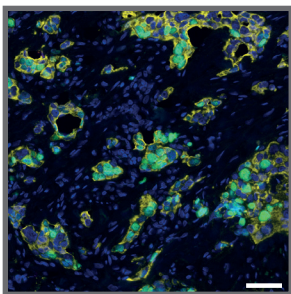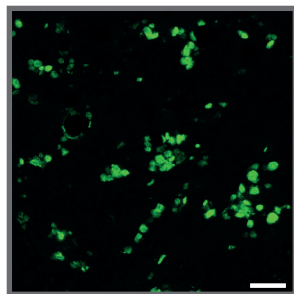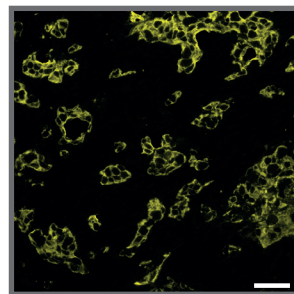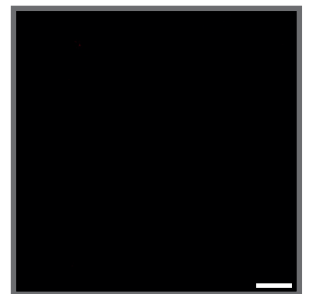

FET

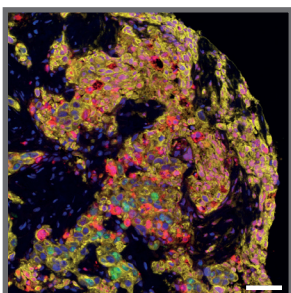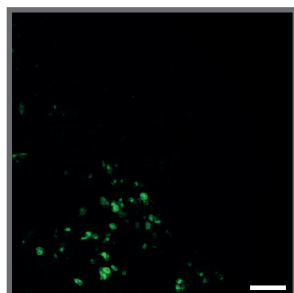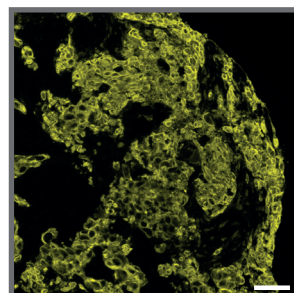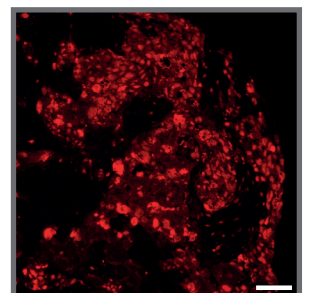

Merge

Ki67

Cytokeratin

cPARP

# Additional File 4

## C

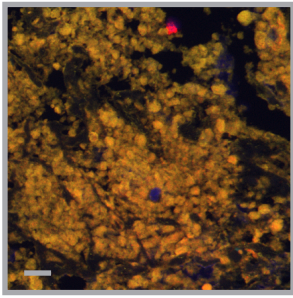

Merge

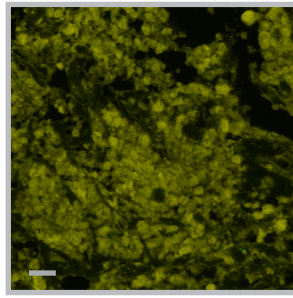

Cytokeratin

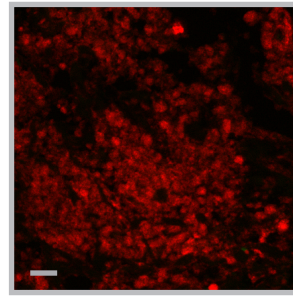

cPARP

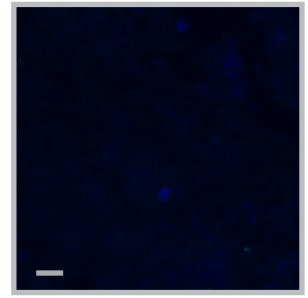

DAPI

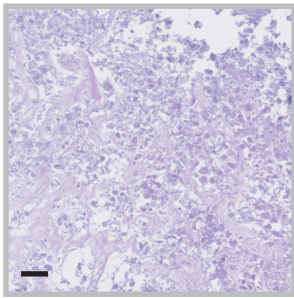

H&E
