# Supplementary material for: An optimised patient-derived explant platform for breast cancer reflects clinical responses to chemotherapy and antibody-directed therapy
Source: PubMed Central journal article supplement (PMC11150370; doi:10.1038/s41598-024-63170-0), 2024-06-04

# **An optimised patient-derived explant platform for breast cancer reflects clinical responses to chemotherapy and antibody-directed therapy**

Constantinos Demetriou<sup>1</sup>, Naila Abid<sup>1</sup>, Michael Butterworth<sup>1</sup>, Larissa Lezina<sup>1</sup>, Pavandeep Sandhu<sup>1</sup>, Lynne Howells<sup>1</sup>, Ian R Powley<sup>1</sup>, James Howard Pringle<sup>1</sup>, Zahirah Sidat<sup>2</sup>, Omar Qassid<sup>1,3</sup>, Dave Purnell<sup>3</sup>, Monika Kaushik<sup>4</sup>, Kaitlin Duckworth<sup>4</sup>, Helen Hartshorn<sup>4</sup>, Anne Thomas<sup>1</sup>, Jacqui A Shaw<sup>1</sup>, Marion MacFarlane<sup>5,6\*</sup>, Catrin Pritchard<sup>1\*</sup>, Gareth J Miles<sup>1\*</sup>

Additional File 5. Time course of BC-PDE culture

BC-PDEs were cultured for 20 hours (O/N) to recover from processing and then cultured for a further 24, 48 and 72 h. total culture times were 44, 68 and 92 h, respectively. T0 = 0 hr baseline control. Scale bars in H&E's represent 100  $\mu$ m and arrows show groups of invasive tumour cells.

# Additional File 5

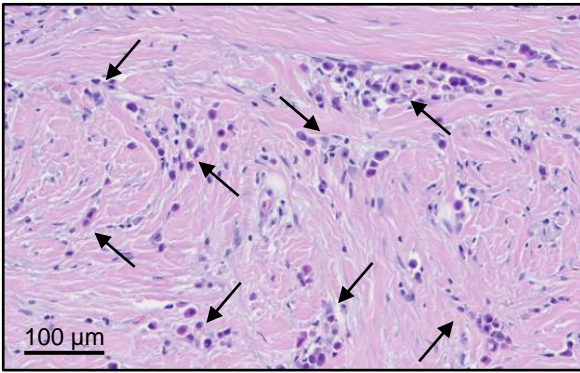

T0

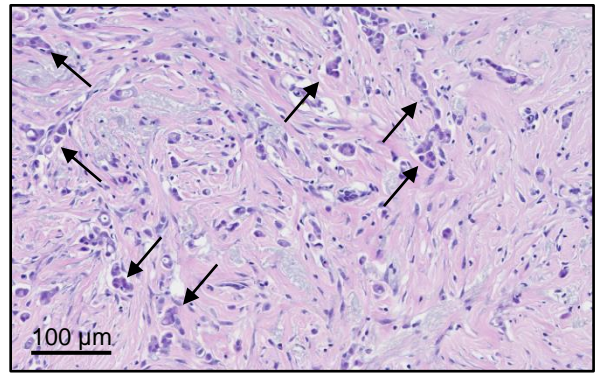

20 h O/N + 24 h

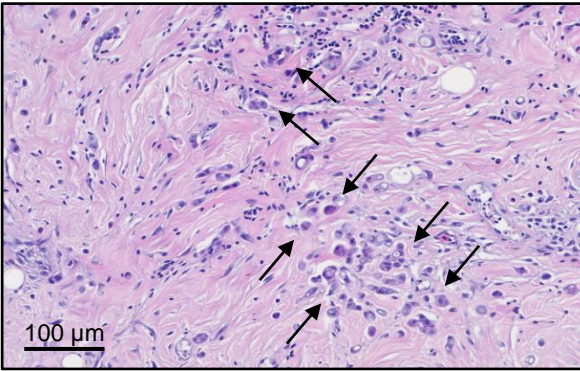

20 h O/N + 48 h

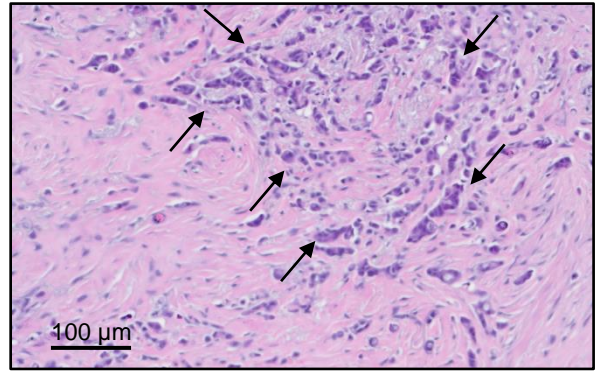

20 h O/N + 72 h

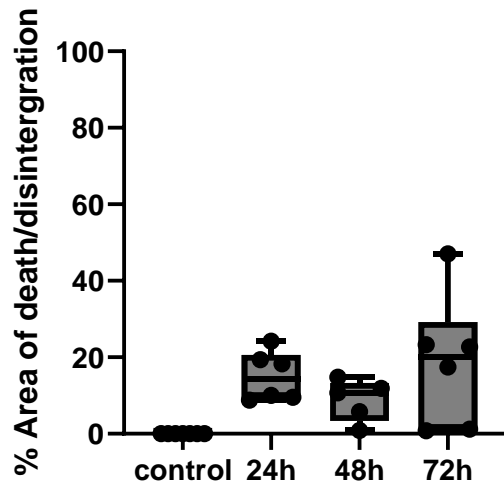

Supplement: 41598_2024_63170_MOESM5_ESM.pdf [file 41598_2024_63170_MOESM5_ESM.pdf]
