# Supplementary material for: An optimised patient-derived explant platform for breast cancer reflects clinical responses to chemotherapy and antibody-directed therapy
Source: PubMed Central journal article supplement (PMC11150370; doi:10.1038/s41598-024-63170-0), 2024-06-04
Supplement: 41598_2024_63170_MOESM6_ESM.pdf [file 41598_2024_63170_MOESM6_ESM.pdf]

# An optimised patient-derived explant platform for breast cancer reflects clinical responses to chemotherapy and antibody-directed therapy

Constantinos Demetriou<sup>1</sup>, Naila Abid<sup>1</sup>, Michael Butterworth<sup>1</sup>, Larissa Lezina<sup>1</sup>, Pavandeep Sandhu<sup>1</sup>, Lynne Howells<sup>1</sup>, Ian R Powley<sup>1</sup>, James Howard Pringle<sup>1</sup>, Zahirah Sidat<sup>2</sup>, Omar Qassid<sup>1,3</sup>, Dave Purnell<sup>3</sup>, Monika Kaushik<sup>4</sup>, Kaitlin Duckworth<sup>4</sup>, Helen Hartshorn<sup>4</sup>, Anne Thomas<sup>1</sup>, Jacqui A Shaw<sup>1</sup>, Marion MacFarlane<sup>5,6\*</sup>, Catrin Pritchard<sup>1\*</sup>, Gareth J Miles<sup>1\*</sup>

## Additional File 6

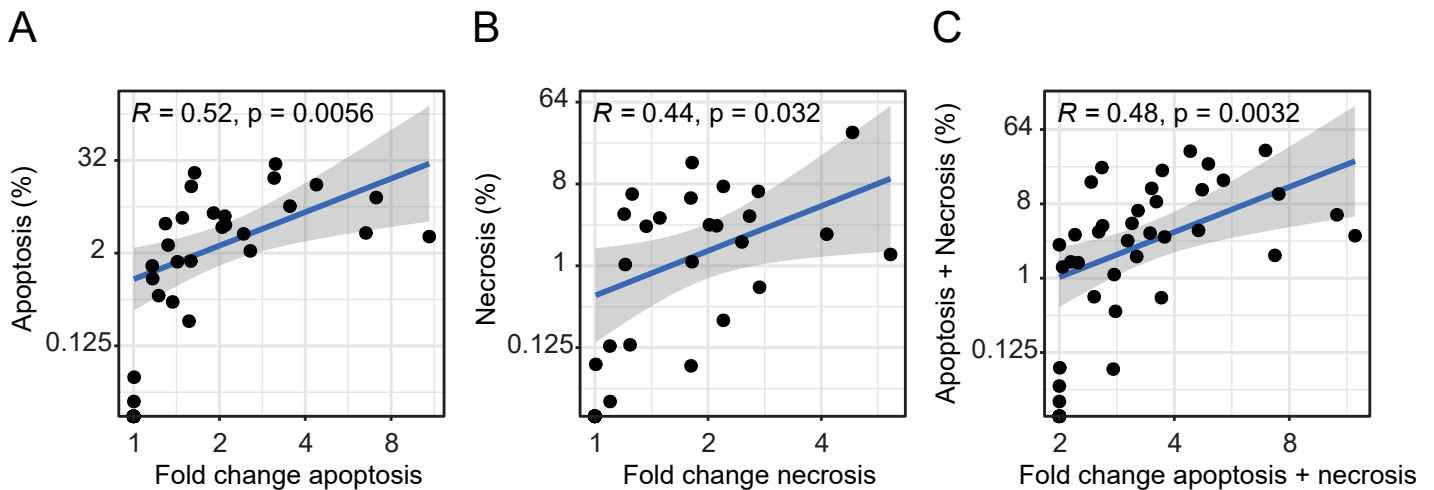

*Additional File 6. Fold change apoptosis and necrosis relative to control versus percent apoptosis and necrosis relative to control in response to FET*

**A**, correlation between tumour apoptosis in FET treated BC-PDEs after subtracting control apoptosis (%) and fold change apoptosis over control. **B**, correlation between area necrosis in FET treated samples after subtracting control necrosis and fold change necrosis over control. **C**, correlation between combined tumour apoptosis and necrosis in FET treated samples after subtracting control values and fold change tumour apoptosis and necrosis over control. A single dot represents the median value of respective values for all IPDEs derived from a given patient sample. Correlation was performed using the Pearson's rank test, where  $p < 0.05$  is considered significant.
