# Supplementary material for: An optimised patient-derived explant platform for breast cancer reflects clinical responses to chemotherapy and antibody-directed therapy
Source: PubMed Central journal article supplement (PMC11150370; doi:10.1038/s41598-024-63170-0), 2024-06-04

# **An optimised patient-derived explant platform for breast cancer reflects clinical responses to chemotherapy and antibody-directed therapy**

Constantinos Demetriou<sup>1</sup>, Naila Abid<sup>1</sup>, Michael Butterworth<sup>1</sup>, Larissa Lezina<sup>1</sup>, Pavandeep Sandhu<sup>1</sup>, Lynne Howells<sup>1</sup>, Ian R Powley<sup>1</sup>, James Howard Pringle<sup>1</sup>, Zahirah Sidat<sup>2</sup>, Omar Qassid<sup>1,3</sup>, Dave Purnell<sup>3</sup>, Monika Kaushik<sup>4</sup>, Kaitlin Duckworth<sup>4</sup>, Helen Hartshorn<sup>4</sup>, Anne Thomas<sup>1</sup>, Jacqui A Shaw<sup>1</sup>, Marion MacFarlane<sup>5,6\*</sup>, Catrin Pritchard<sup>1\*</sup>, Gareth J Miles<sup>1\*</sup>

Additional File 7. BC-PDE cell death responses to FET in the Stromal areas

**A**, FET-induced stromal apoptosis expressed as fold change over control across 46 BC-PDE samples. **B**, Correlation between FET-induced stromal apoptosis and FET-induced tumour apoptosis. **C**, Correlation between FET-induced stromal apoptosis and FET-induced combined tumour apoptosis and necrosis. A single dot represents the median values for all PDEs derived from a given patient, and correlations are Pearson's rank test where  $p < 0.05$  is considered significant.

# Additional File 7

A

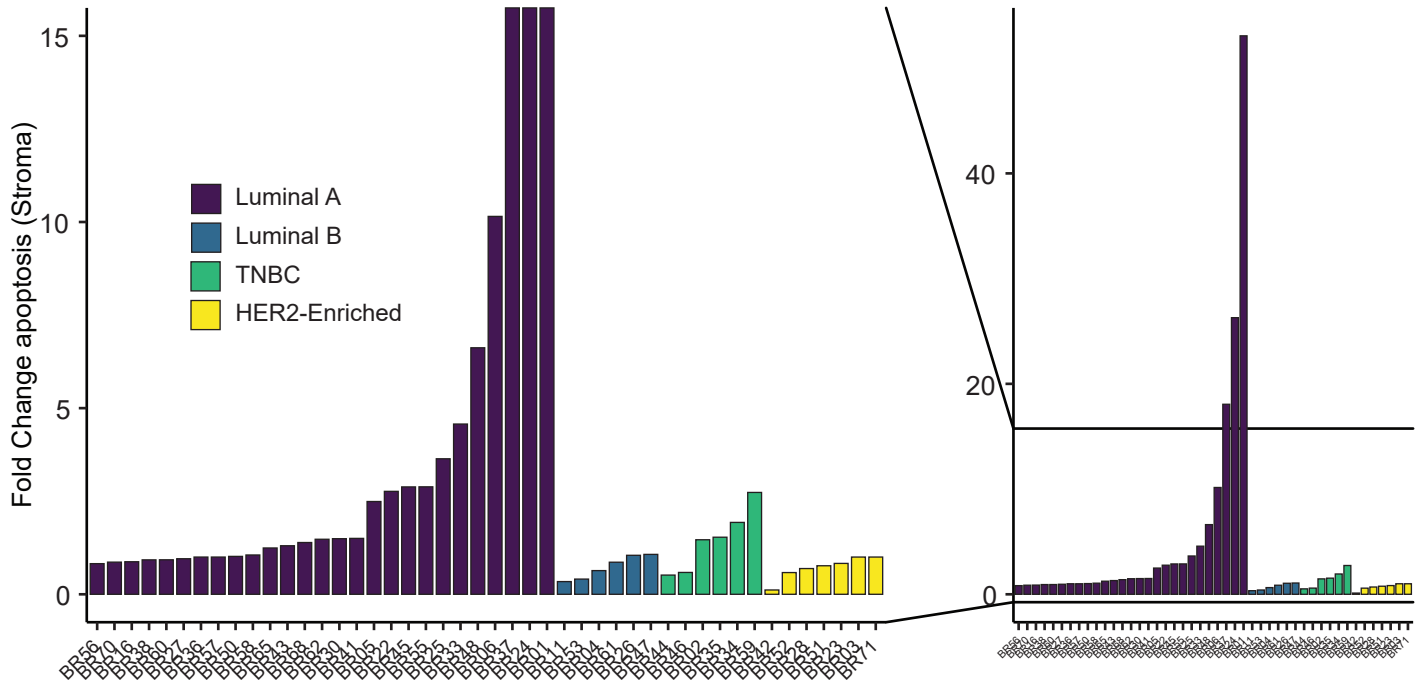

B

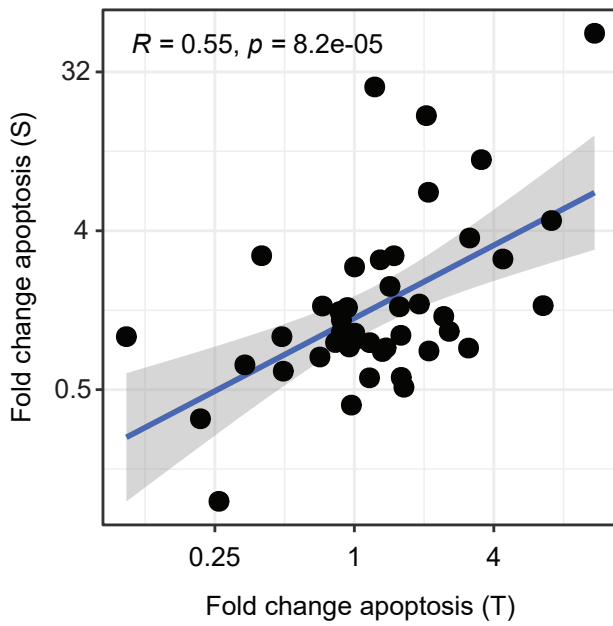

C

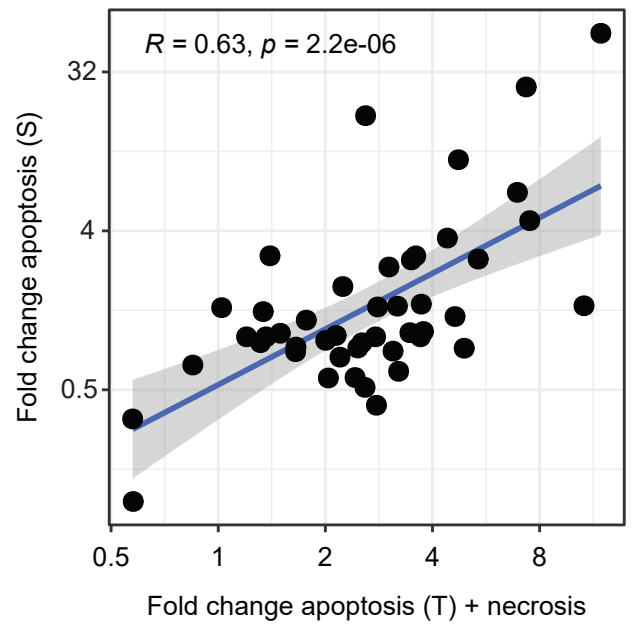

Supplement: 41598_2024_63170_MOESM7_ESM.pdf [file 41598_2024_63170_MOESM7_ESM.pdf]
