# Supplementary material for: An optimised patient-derived explant platform for breast cancer reflects clinical responses to chemotherapy and antibody-directed therapy
Source: PubMed Central journal article supplement (PMC11150370; doi:10.1038/s41598-024-63170-0), 2024-06-04

# **An optimised patient-derived explant platform for breast cancer reflects clinical responses to chemotherapy and antibody-directed therapy**

Constantinos Demetriou<sup>1</sup>, Naila Abid<sup>1</sup>, Michael Butterworth<sup>1</sup>, Larissa Lezina<sup>1</sup>, Pavandeep Sandhu<sup>1</sup>, Lynne Howells<sup>1</sup>, Ian R Powley<sup>1</sup>, James Howard Pringle<sup>1</sup>, Zahirah Sidat<sup>2</sup>, Omar Qassid<sup>1,3</sup>, Dave Purnell<sup>3</sup>, Monika Kaushik<sup>4</sup>, Kaitlin Duckworth<sup>4</sup>, Helen Hartshorn<sup>4</sup>, Anne Thomas<sup>1</sup>, Jacqui A Shaw<sup>1</sup>, Marion MacFarlane<sup>5,6\*</sup>, Catrin Pritchard<sup>1\*</sup>, Gareth J Miles<sup>1\*</sup>

Additional File 8: Ki67 and Geminin changes in BC-PDEs in response to FET

**A**, whole slide Ki67, cytokeratin and Geminin mIF-stained sections of BC-PDEs derived from 37 patients were digitised using the Vectra Polaris. Captured images were used to generate pseudo-DAB images of cytokeratin, Ki67 and Geminin using PhenoChart. Scale bar represents 20  $\mu\text{m}$ . Images were then analysed in InForm to identify Geminin+ve and Ki67+ve cells. **B**, Correlation between the number of Ki67 positive cells and Geminin positive cells in BC-PDEs. Each dot represents a single explant, derived from either control or FET-treated samples. 560 BC-PDEs were used for this analysis **C**, Correlation between fold change Ki67 and fold change geminin with respect to control, in FET treated BC-PDEs, each dot represents the median values for all PDEs derived from a given patient. Correlations are Pearson's rank test where  $p < 0.05$  is considered significant.

Additional File 8

A

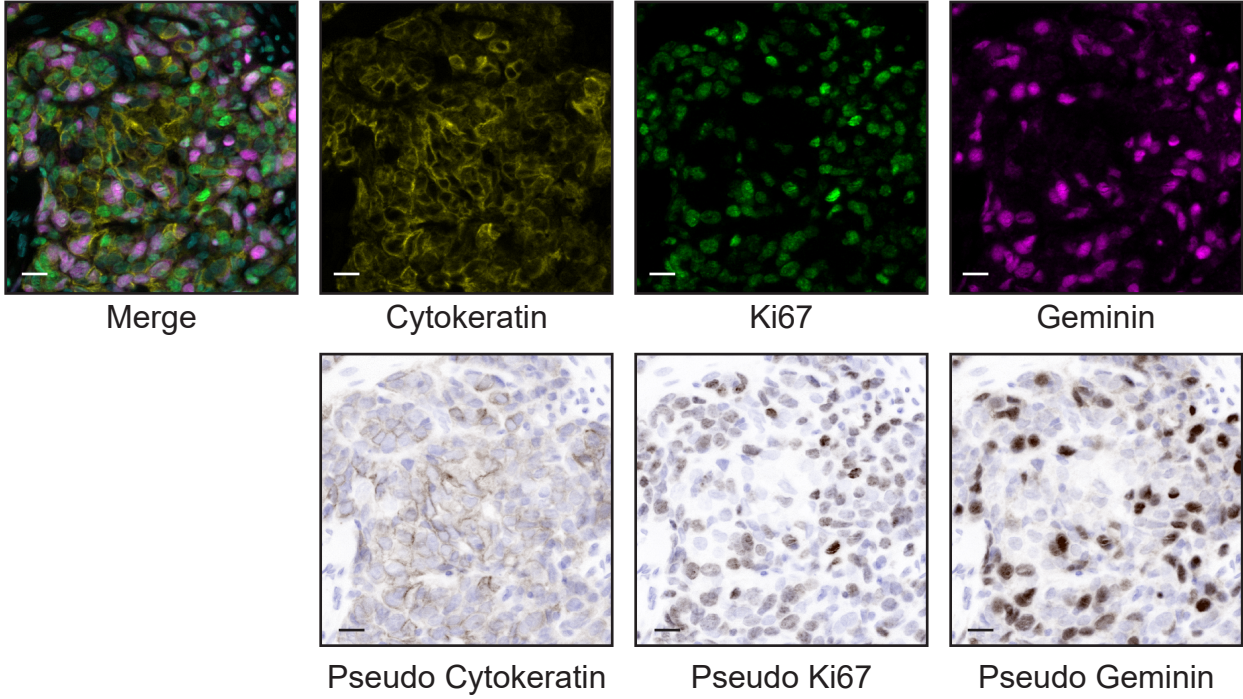

B

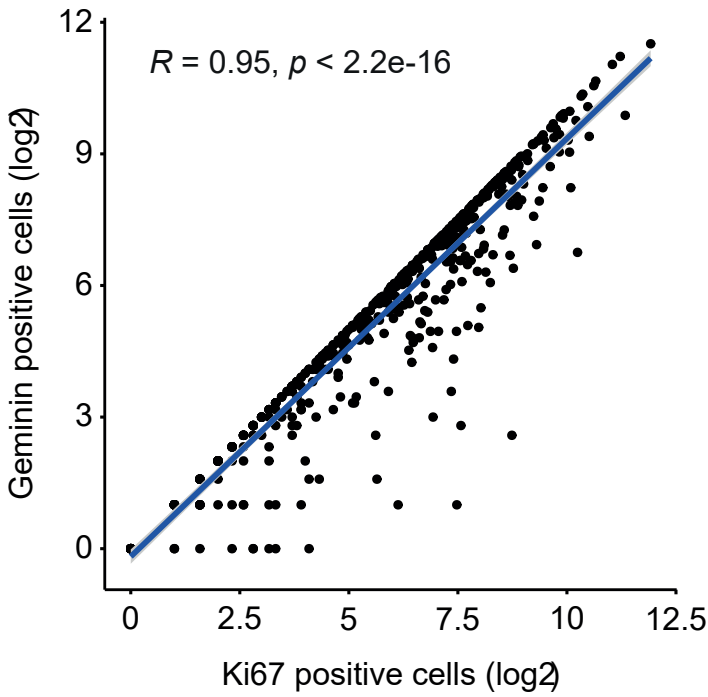

C

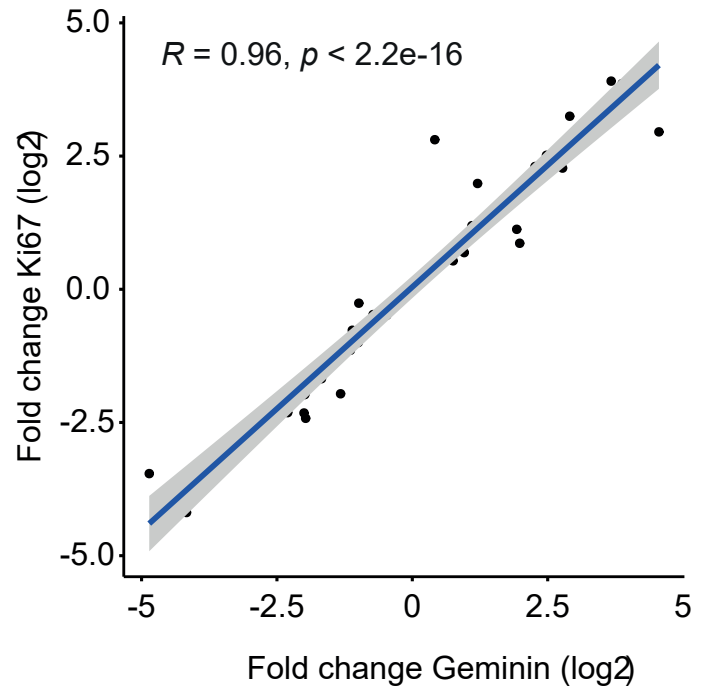

Supplement: 41598_2024_63170_MOESM8_ESM.pdf [file 41598_2024_63170_MOESM8_ESM.pdf]
